# Supplementary material
Source: publisher figshare collection journal article supplement (https://tandf.figshare.com/ndownloader/files/15603983)
Supplement: Supplementary file 1 [file 15603983]

Some New NH-, NH,S-, S,S- and NH,NH- Substituted 1,4- naphtho(benzo)quinones

Aysecik Kacmaz*a

aDepartment of Chemistry, Division of Organic Chemistry, Istanbul University – Cerrahpasa, Avcilar, Istanbul, 34320, Turkey

e-mail: kacmaz@istanbul.edu.tr

**Supplemental Materials**


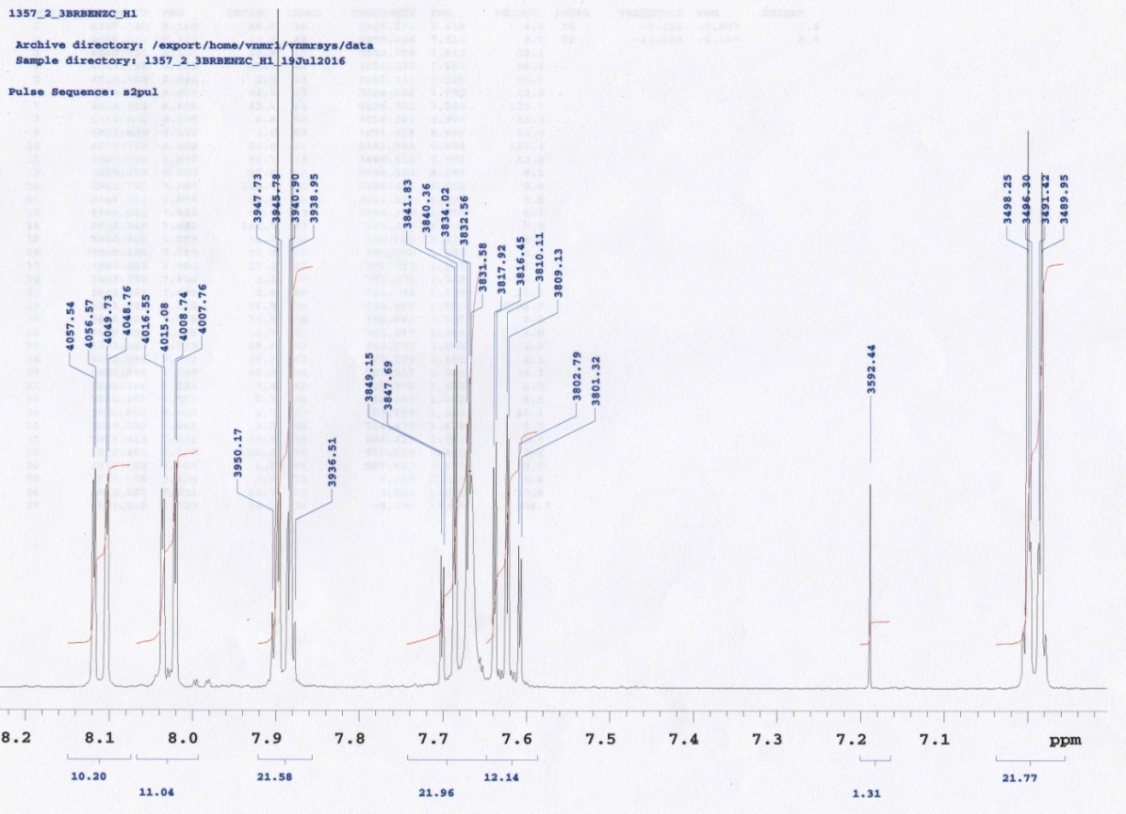


**Figure S 1:** 1H-NMR spectrum of compound **4**


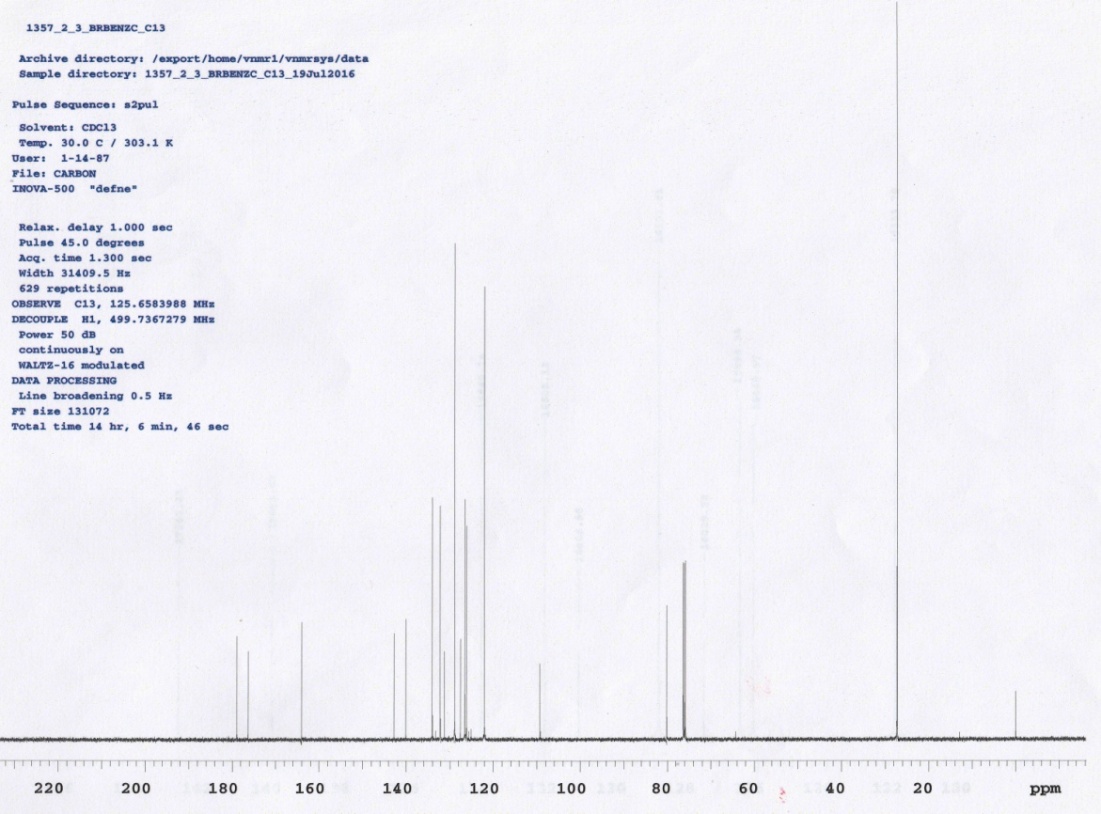


**Figure S 2:** 13C-NMR spectrum of compound **4**


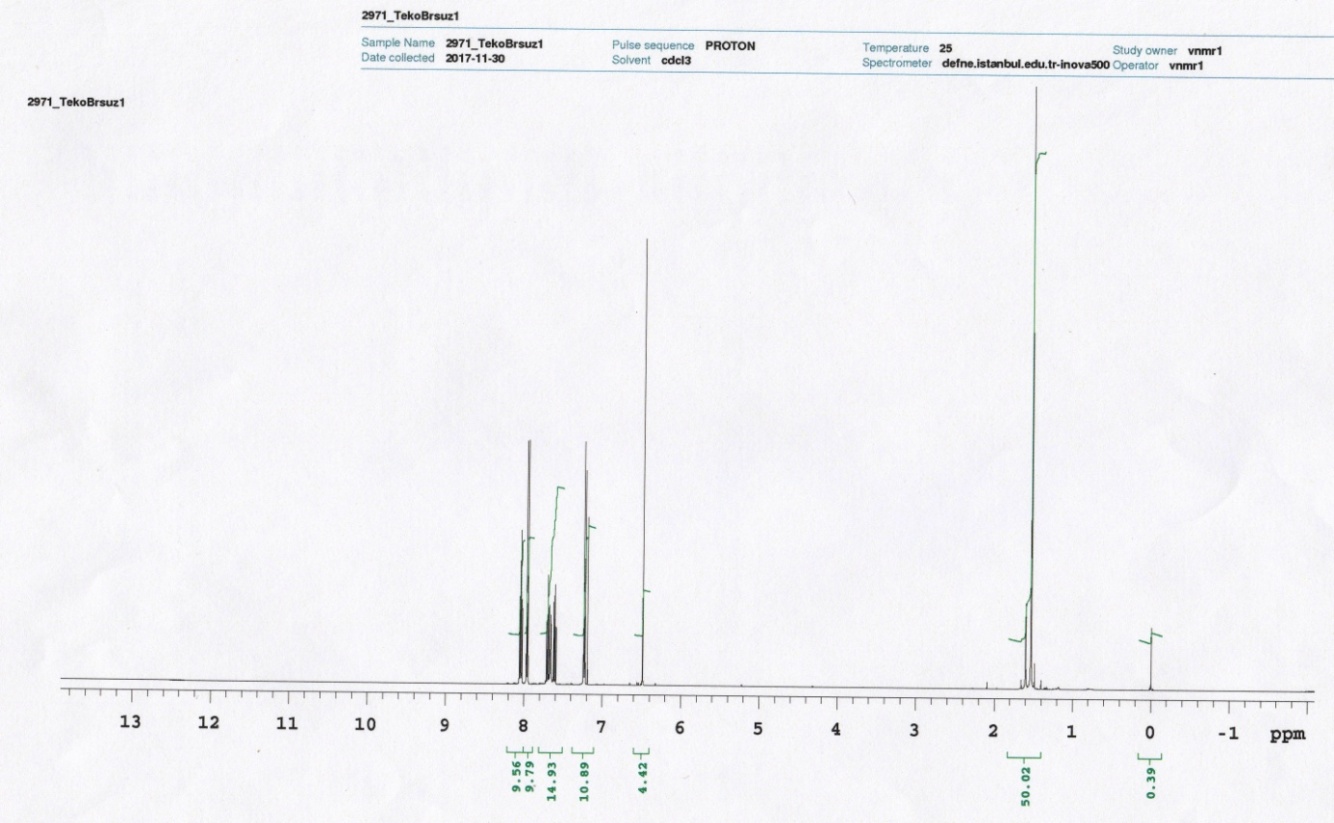


**Figure S 3:** 1H-NMR spectrum of compound **5**


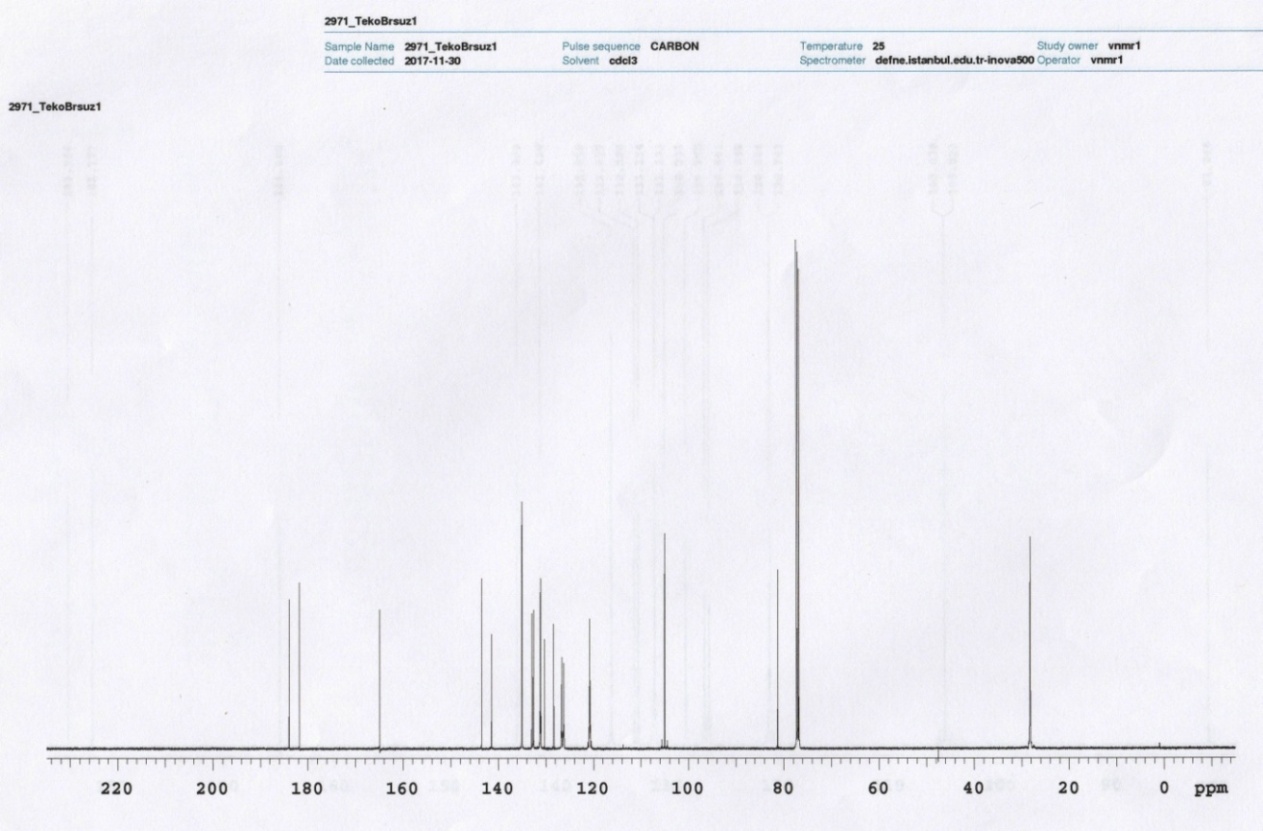


**Figure S 4:**  13C-NMR spectrum of compound **5**


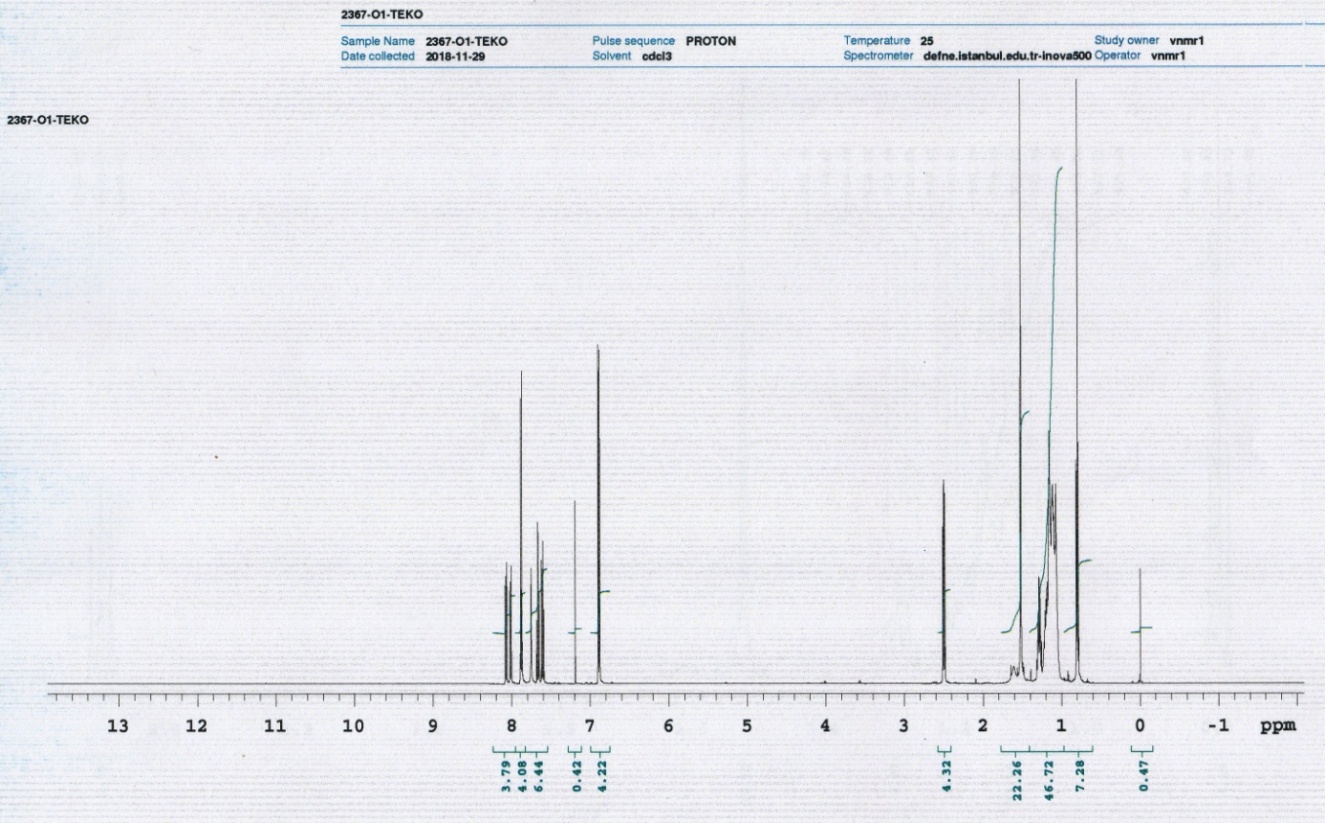
**Figure S 5:** 1H NMR spectrum of **7**


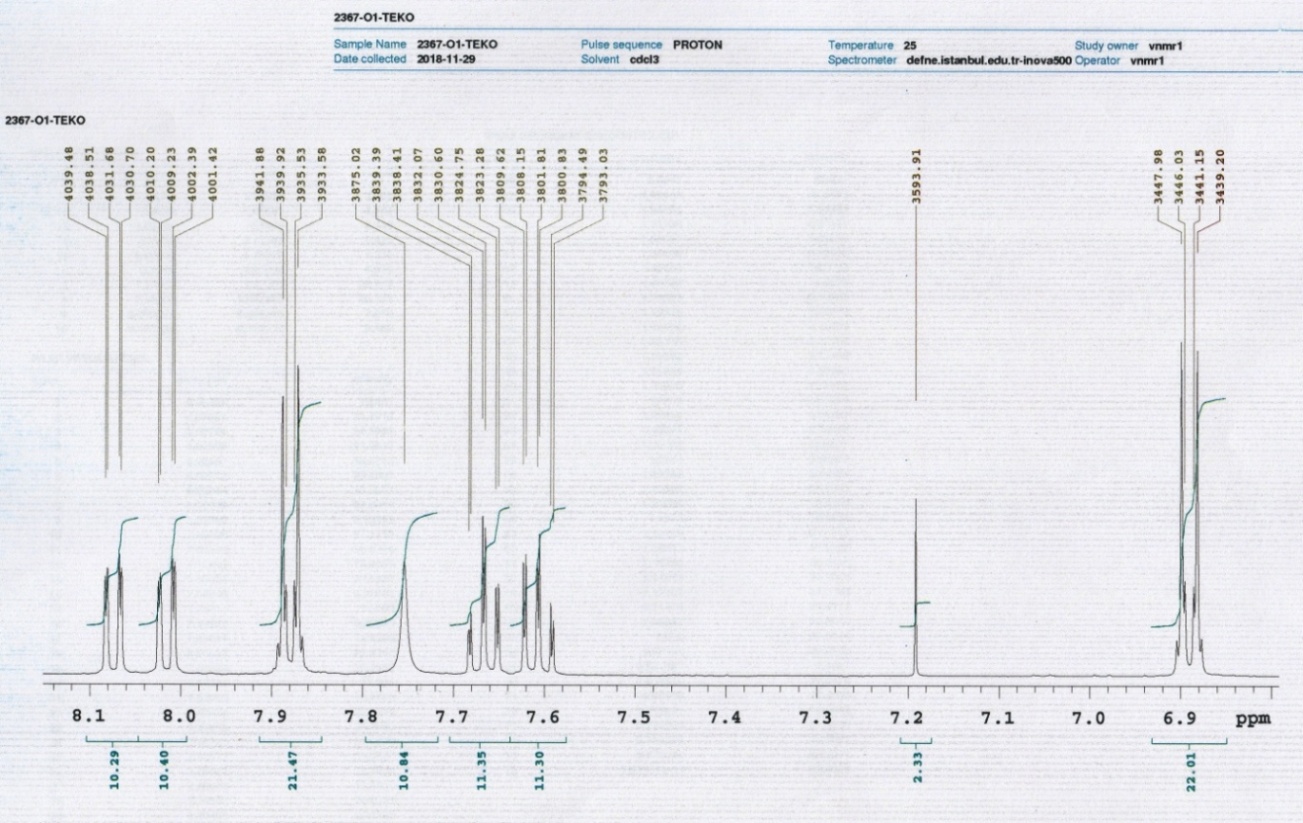


**Figure S 6:** 1H NMR spectrum of **7**


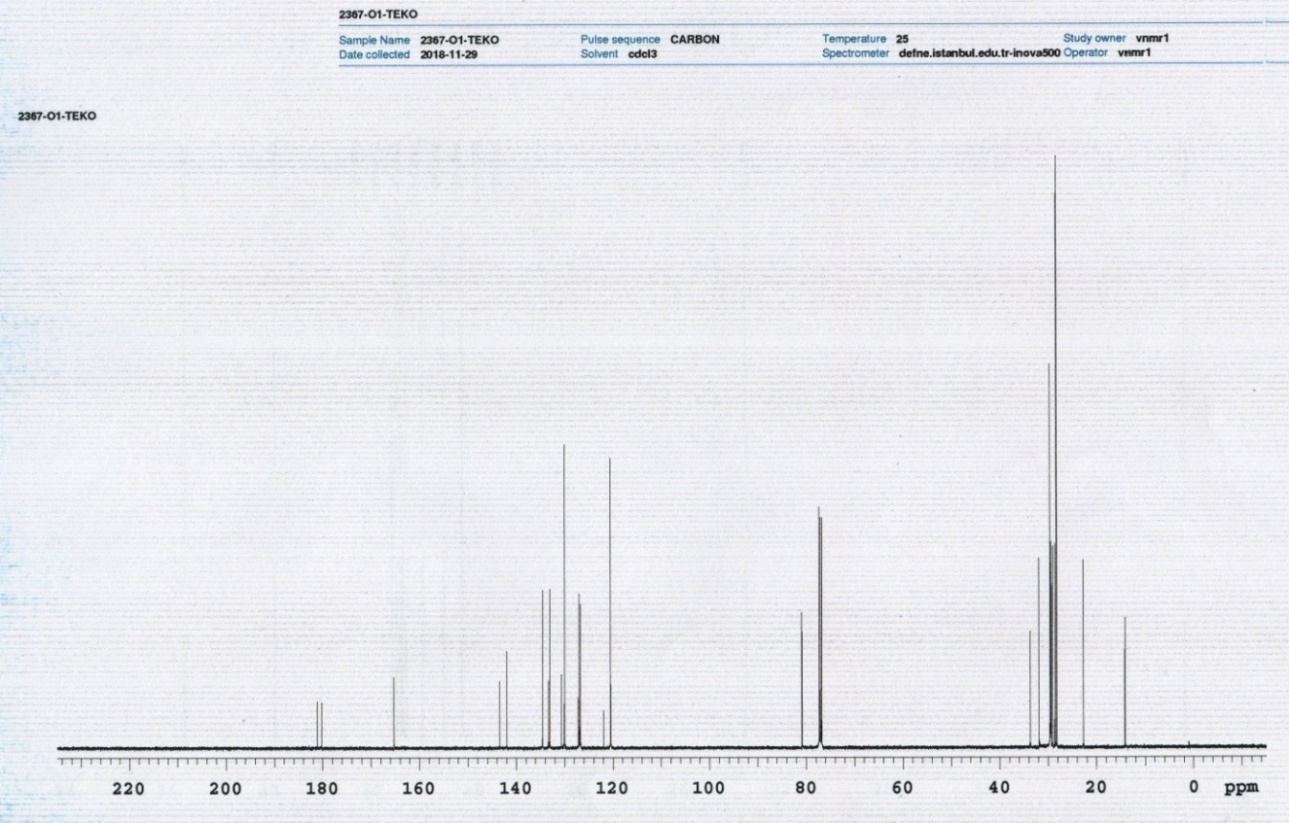


**Figure S 7:** 13C NMR spectrum of **7**


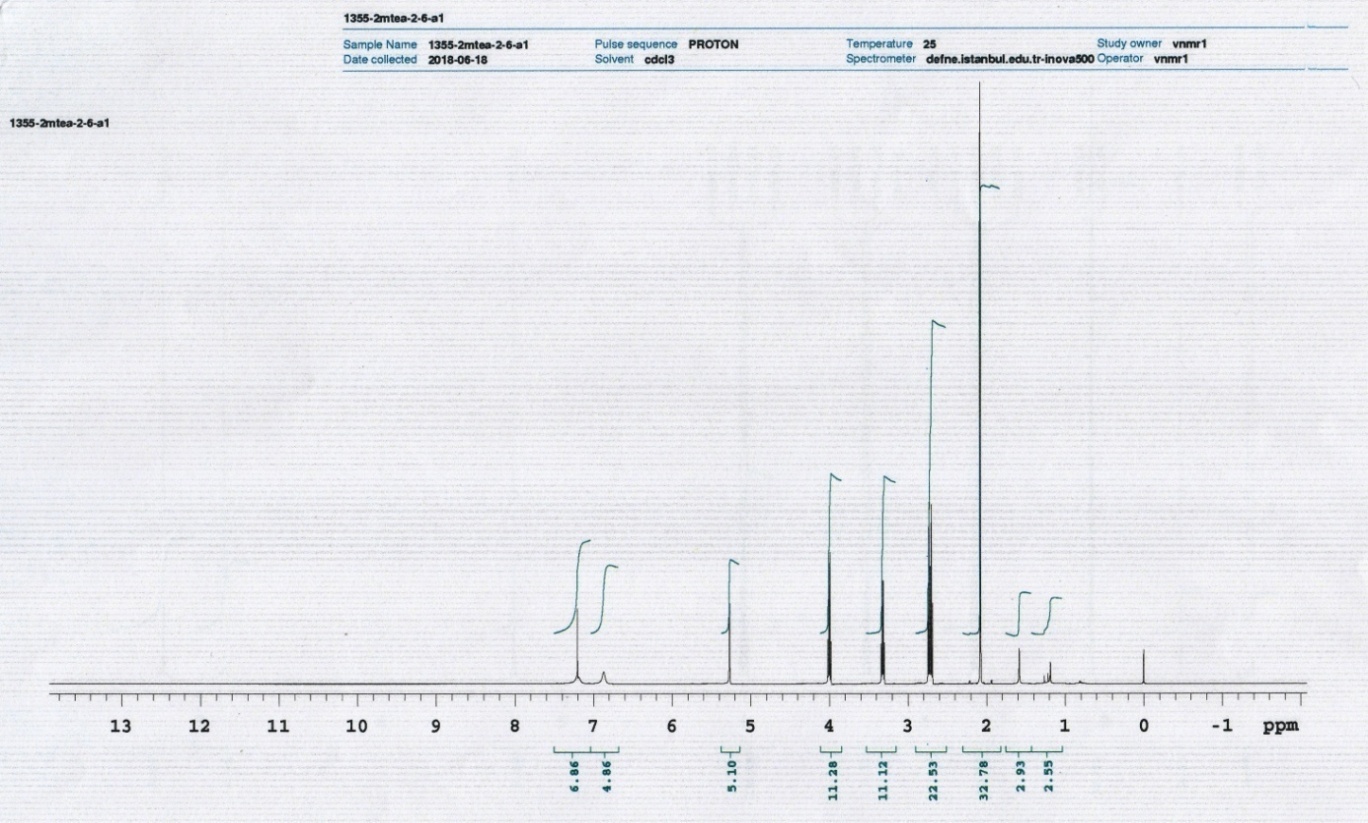


**Figure S 8:** 1H NMR spectrum of **10a**


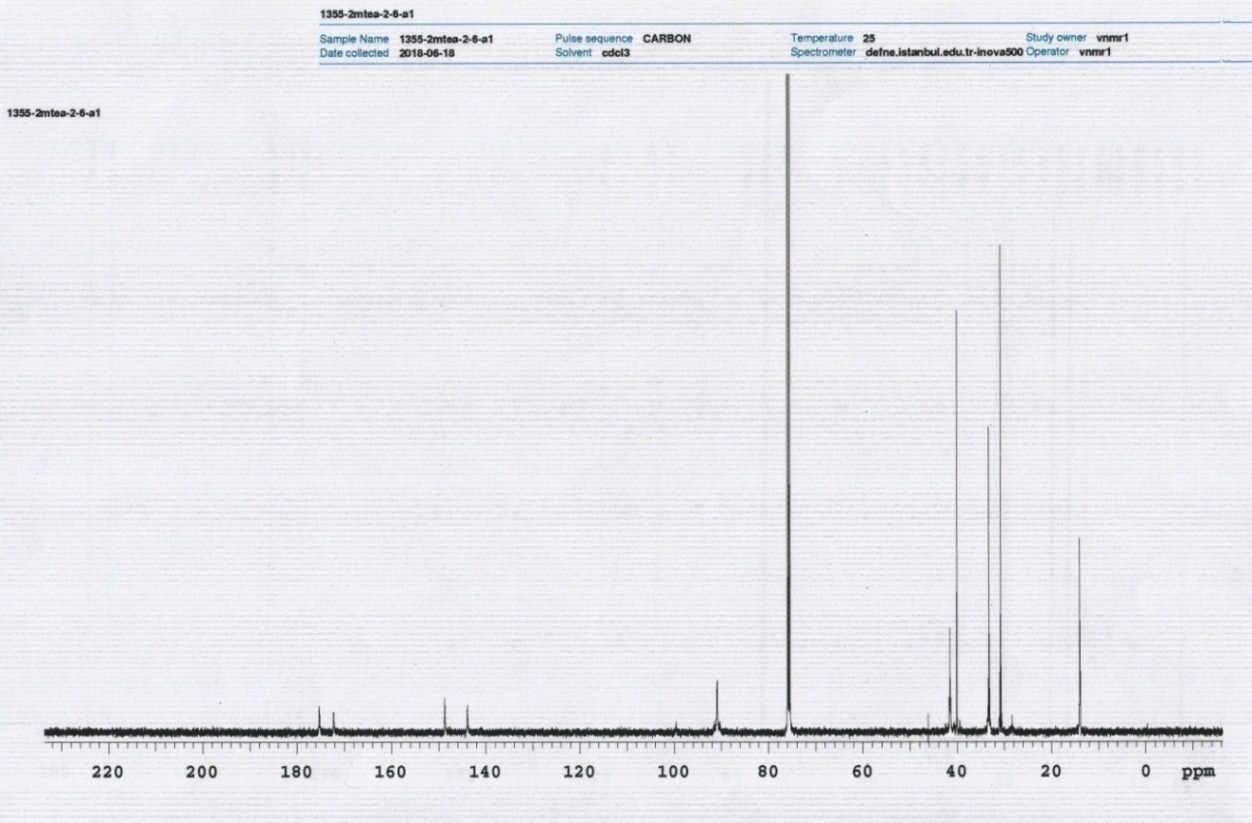


**Figure S 9:** 13C NMR spectrum of **10a**


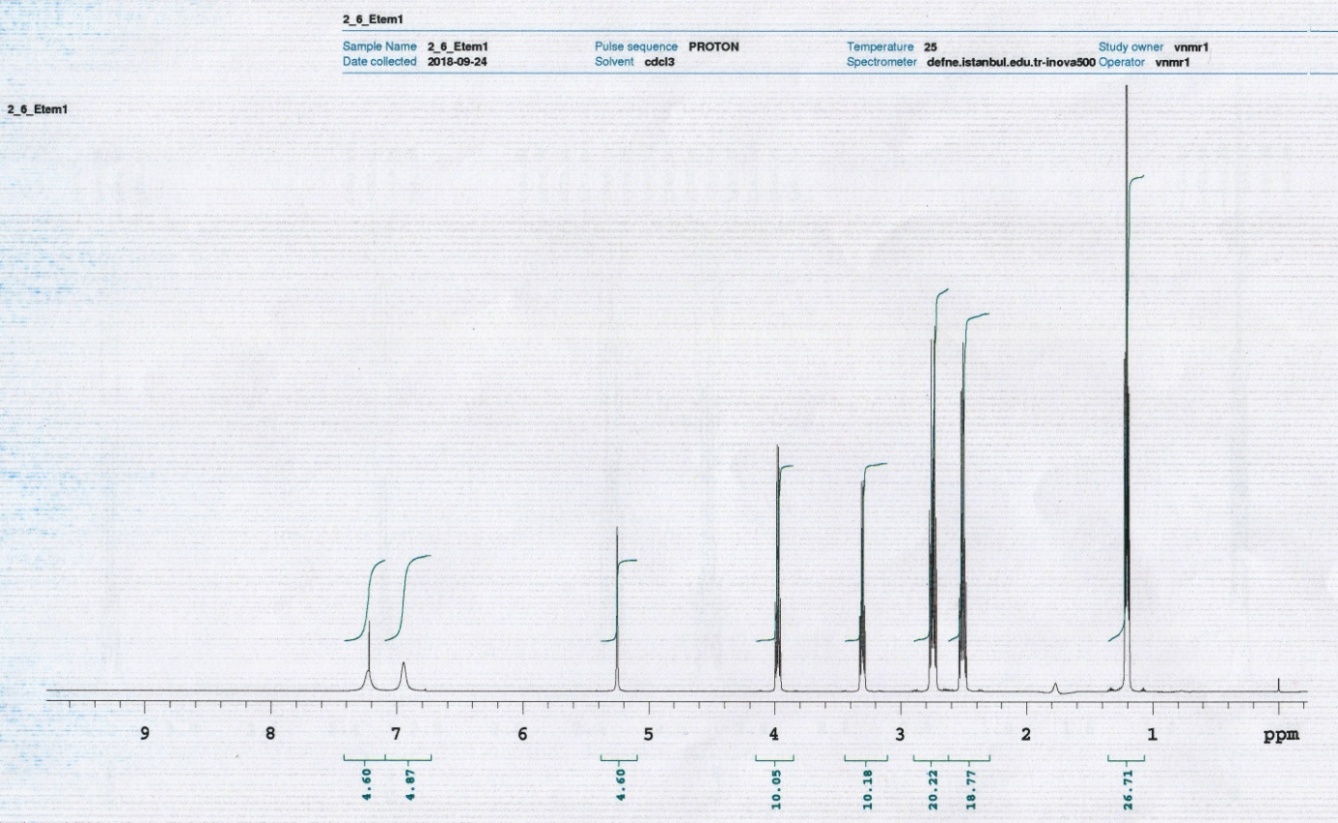


**Figure S 10:** 1H NMR spectrum of **10b**


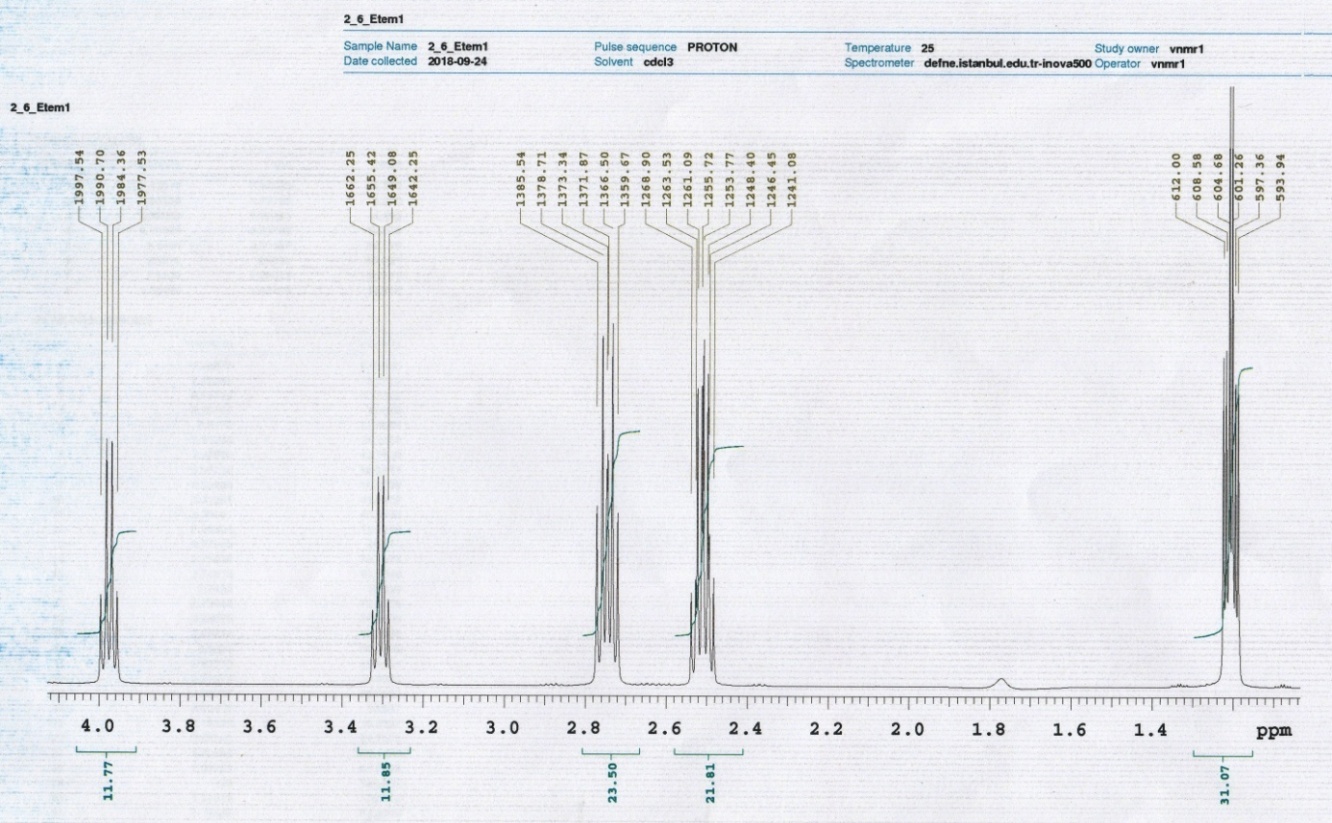


**Figure S 11:** 1H NMR spectrum of **10b**


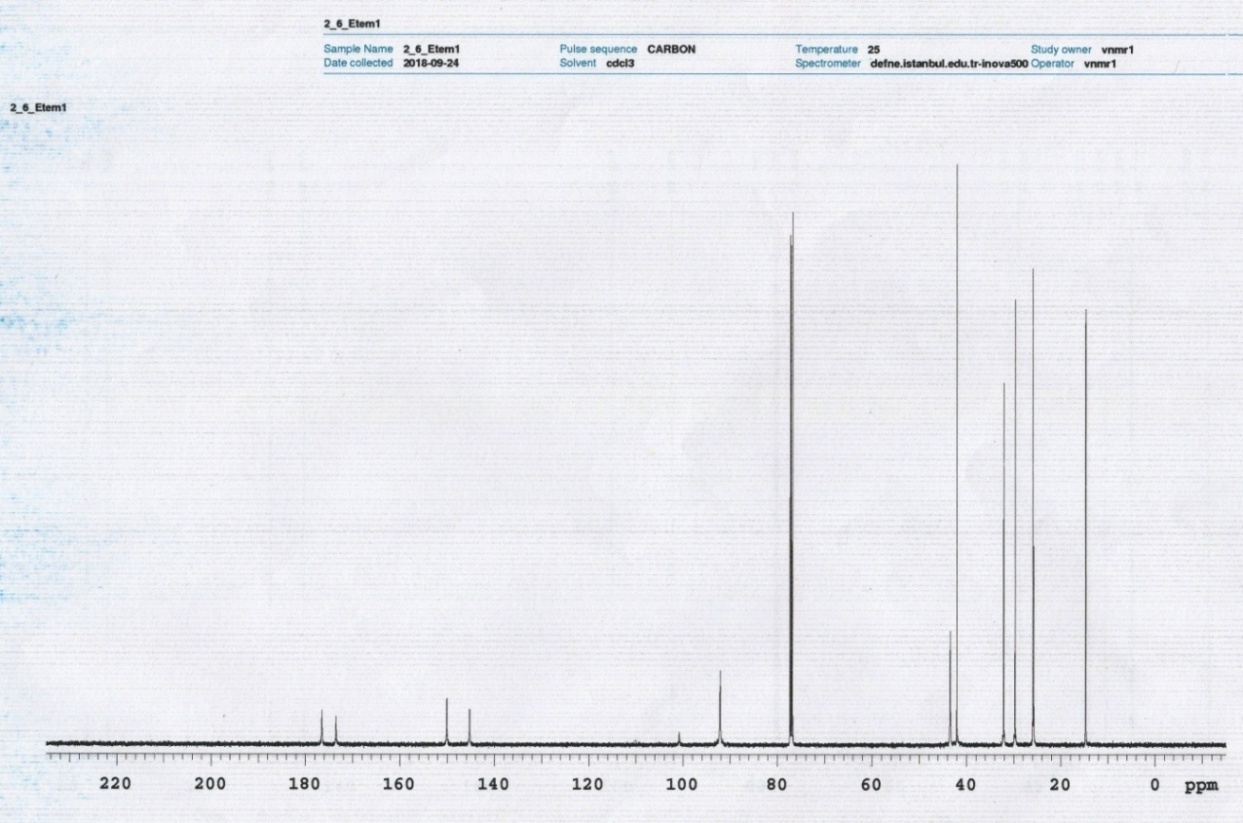


**Figure S 12:** 13C NMR spectrum of **10b**


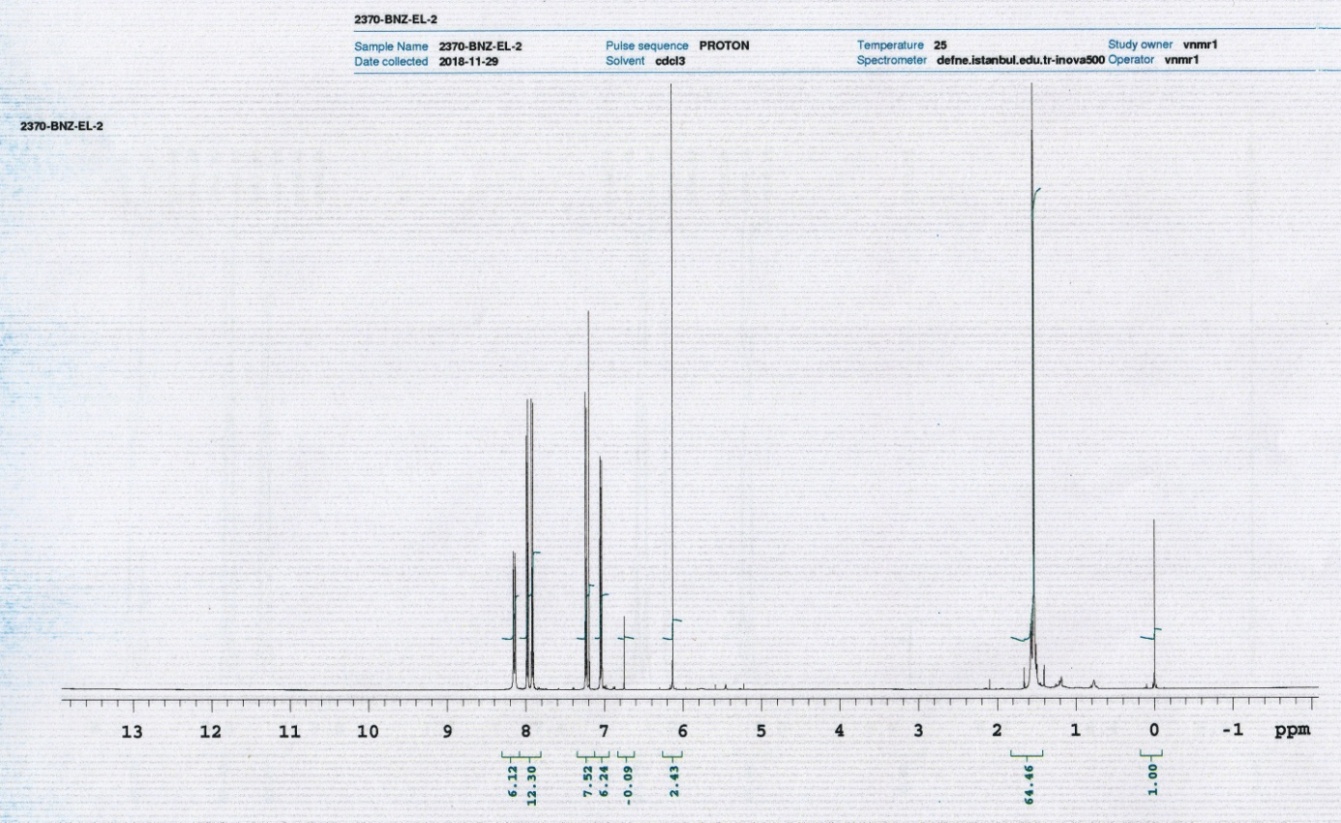


**Figure S 13:** 1H NMR spectrum of **10c**


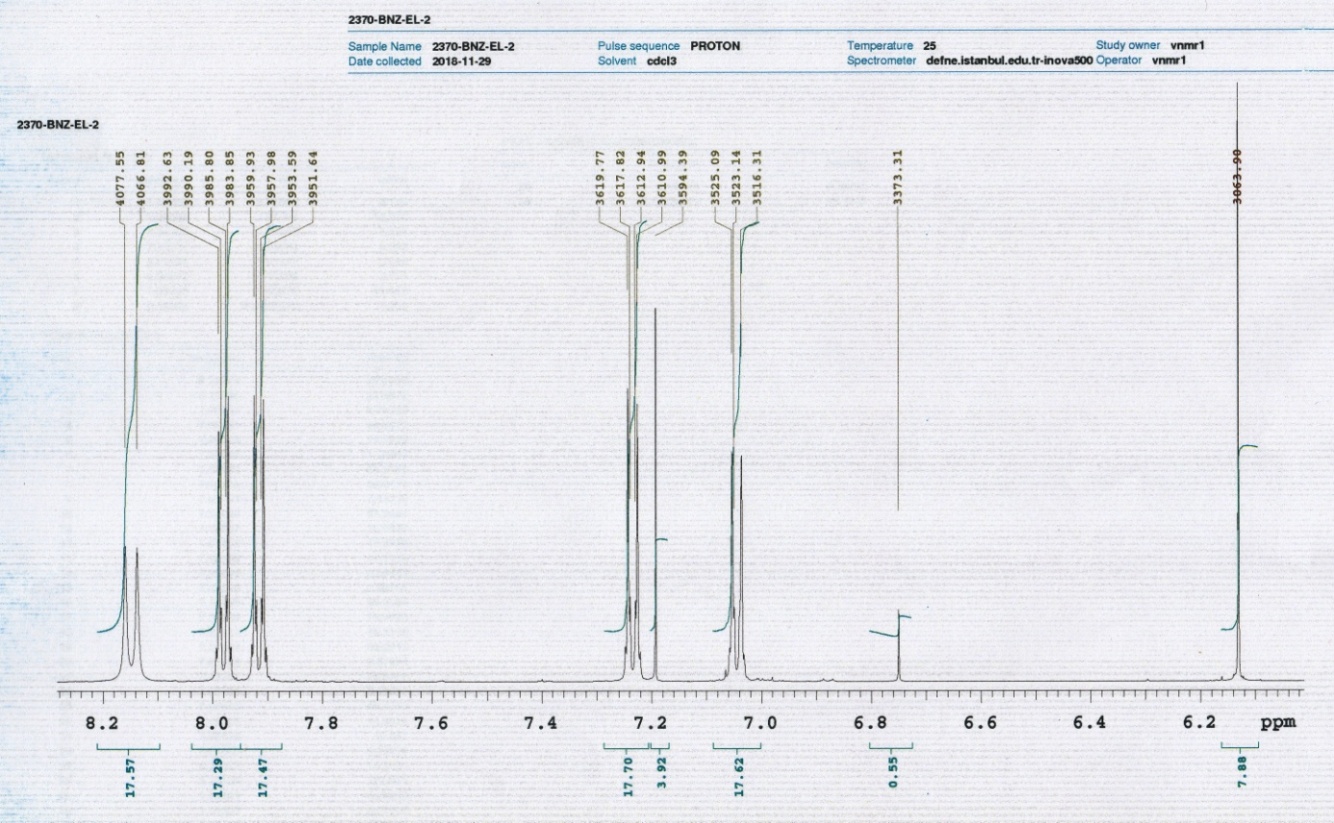


**Figure S 14:** 1H NMR spectrum of **10c**


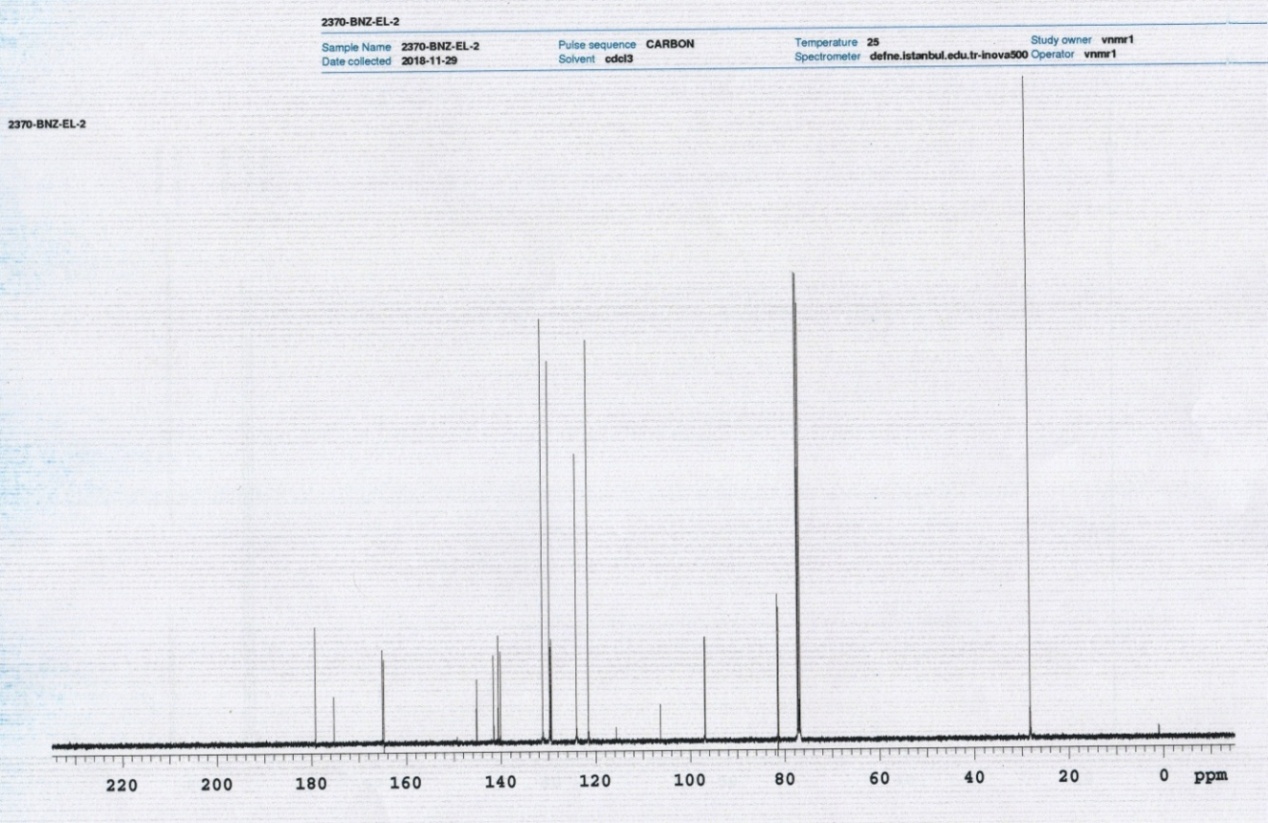


**Figure S 15:** 13C NMR spectrum of **10c**


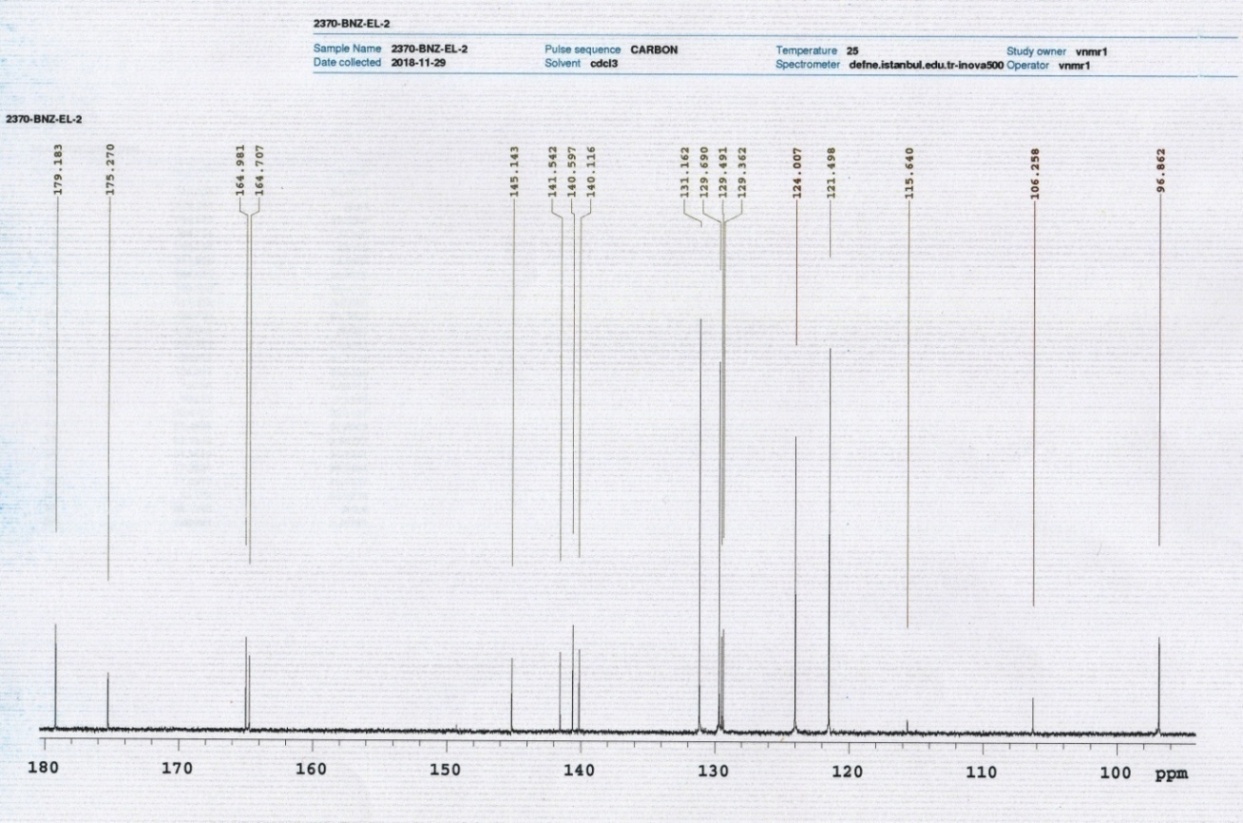


**Figure S 16:** 13C NMR spectrum of **10c**


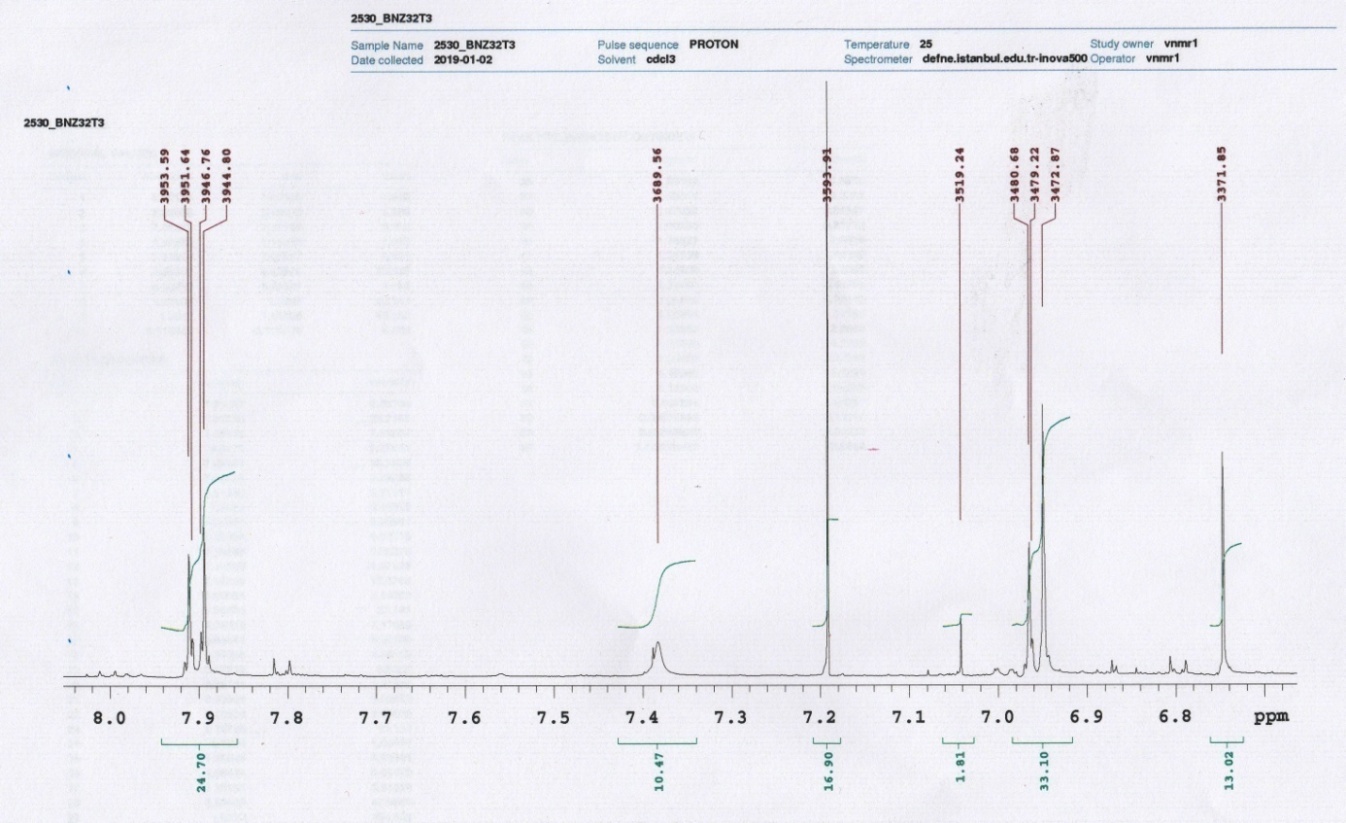


**Figure S 17:** 1H NMR spectrum of **11c**

**Figure S 18:** 1H NMR spectrum of **14**

**Figure S 19:** 13C NMR spectrum of **14**

**Figure S 20:** 1H NMR spectrum of **15**


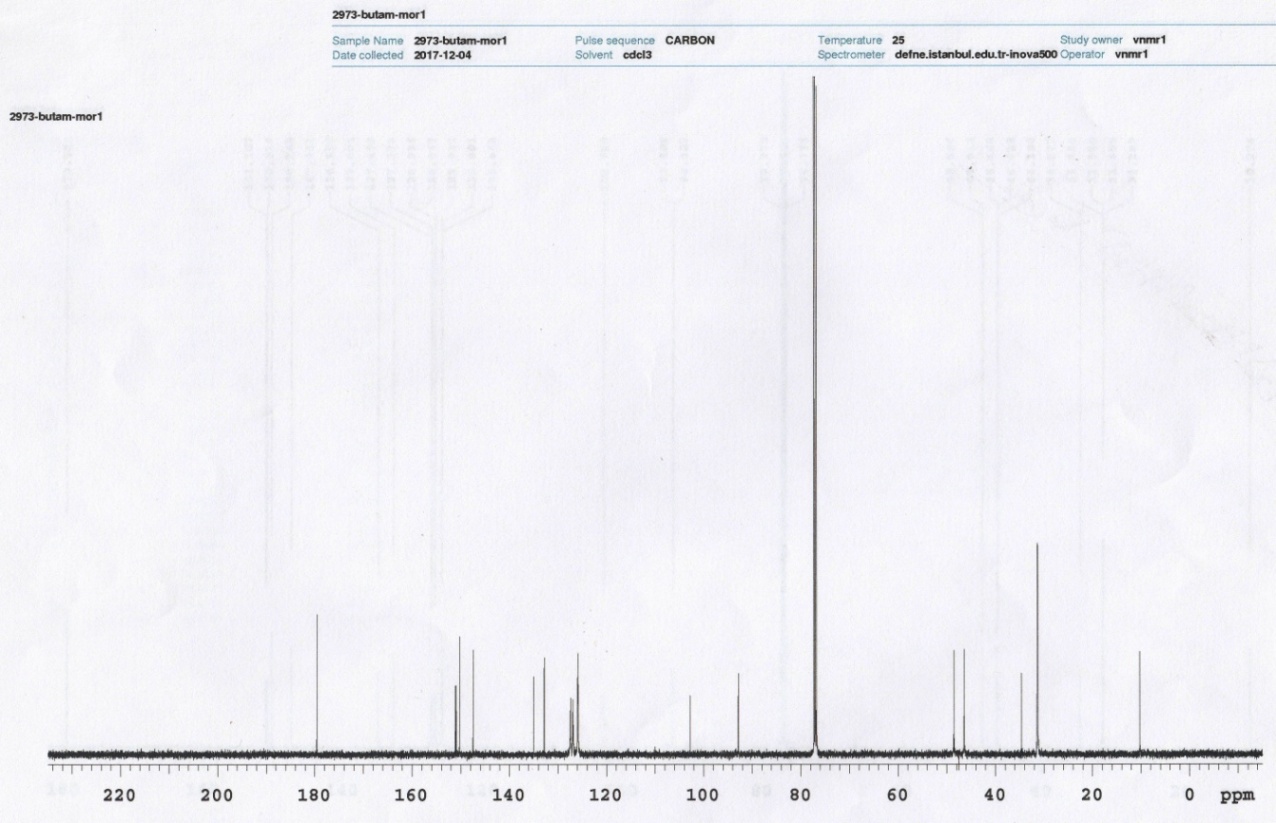


**Figure S 21:** 13C NMR spectrum of **15**


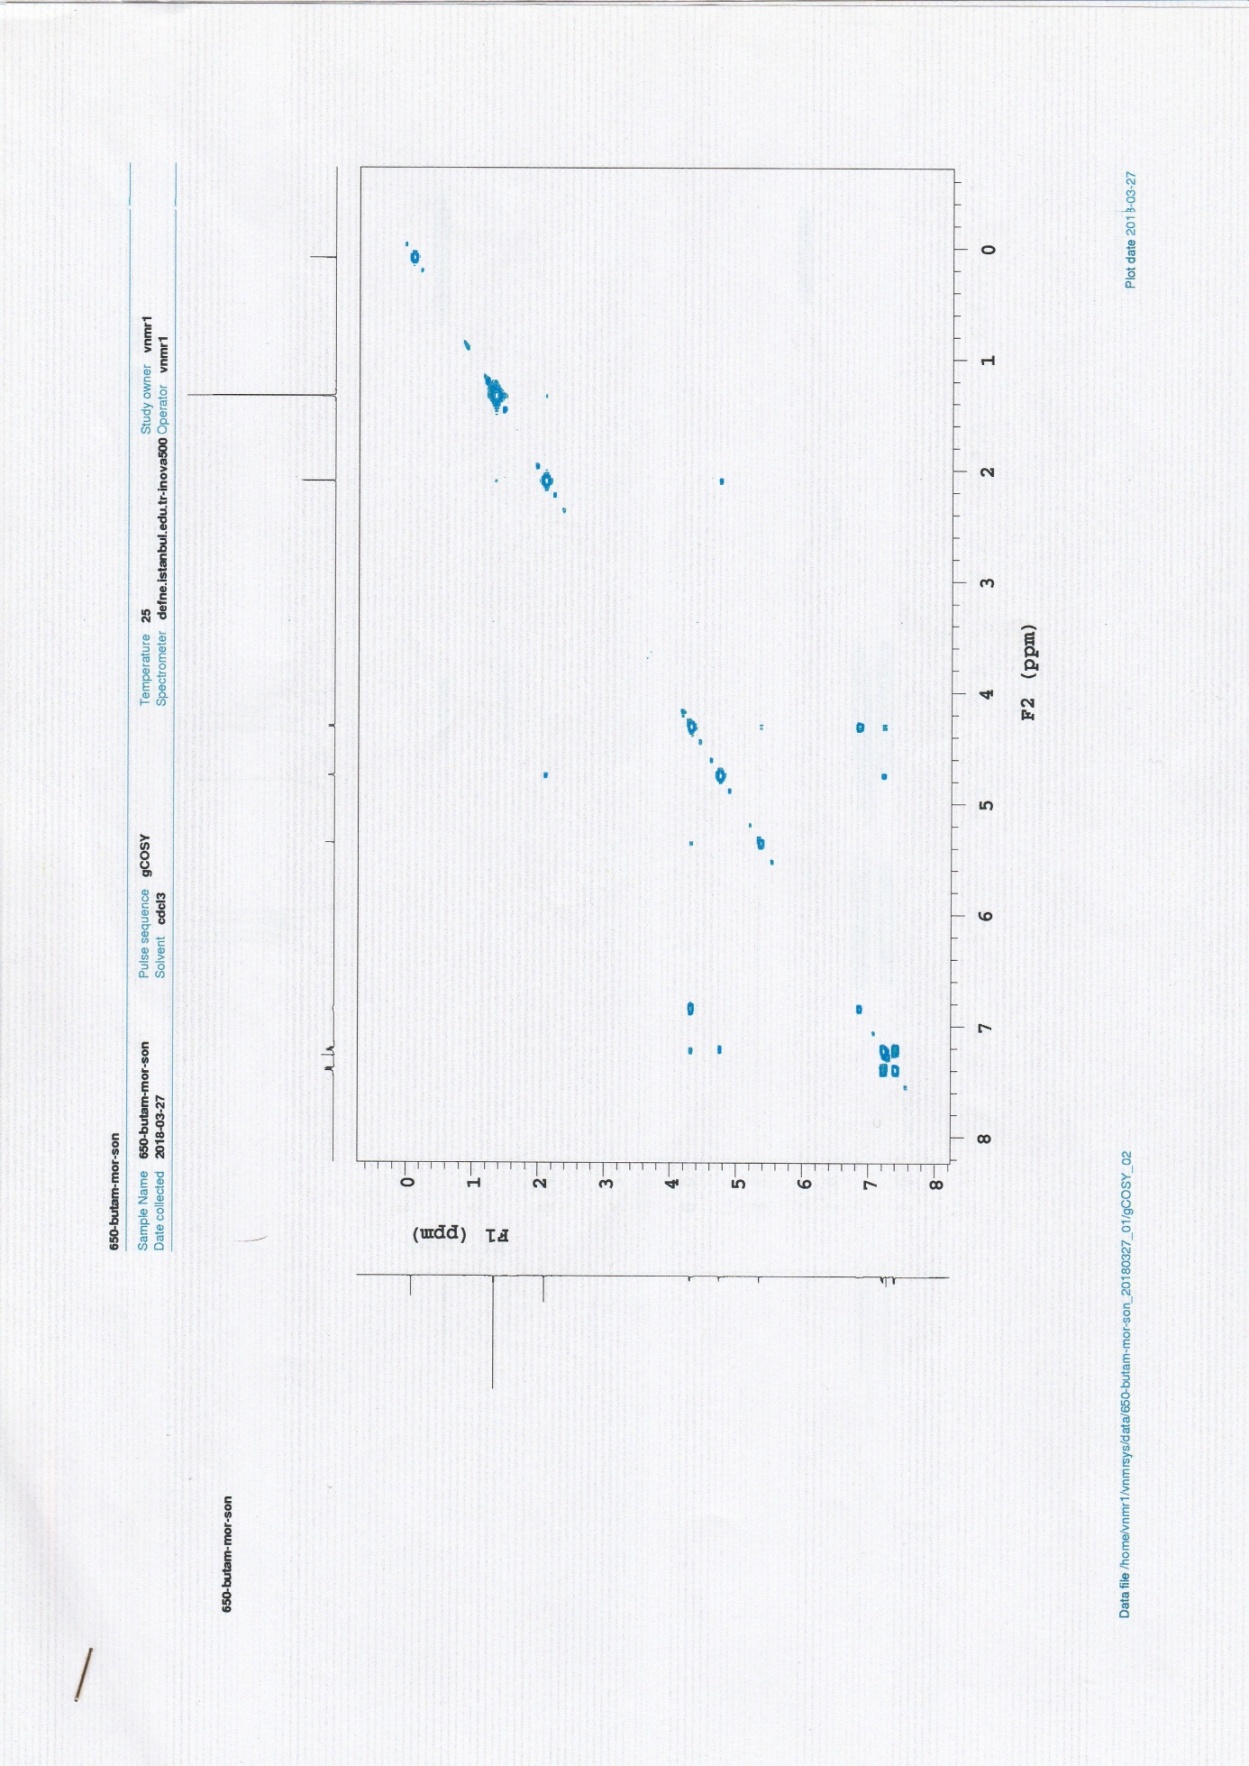


**Figure S 22:** COSY NMR spectrum of **15**


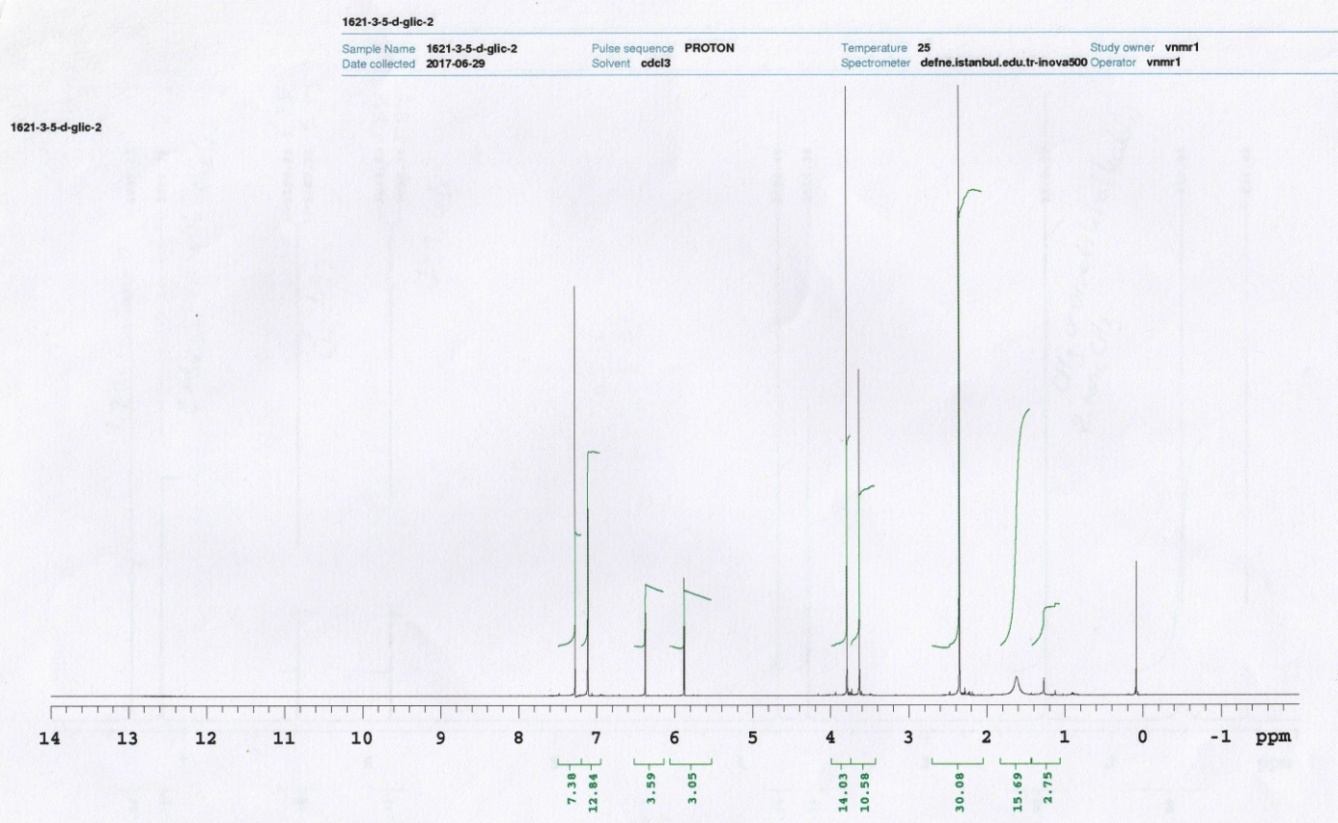


**Figure S 23:** 1H NMR spectrum of **18**


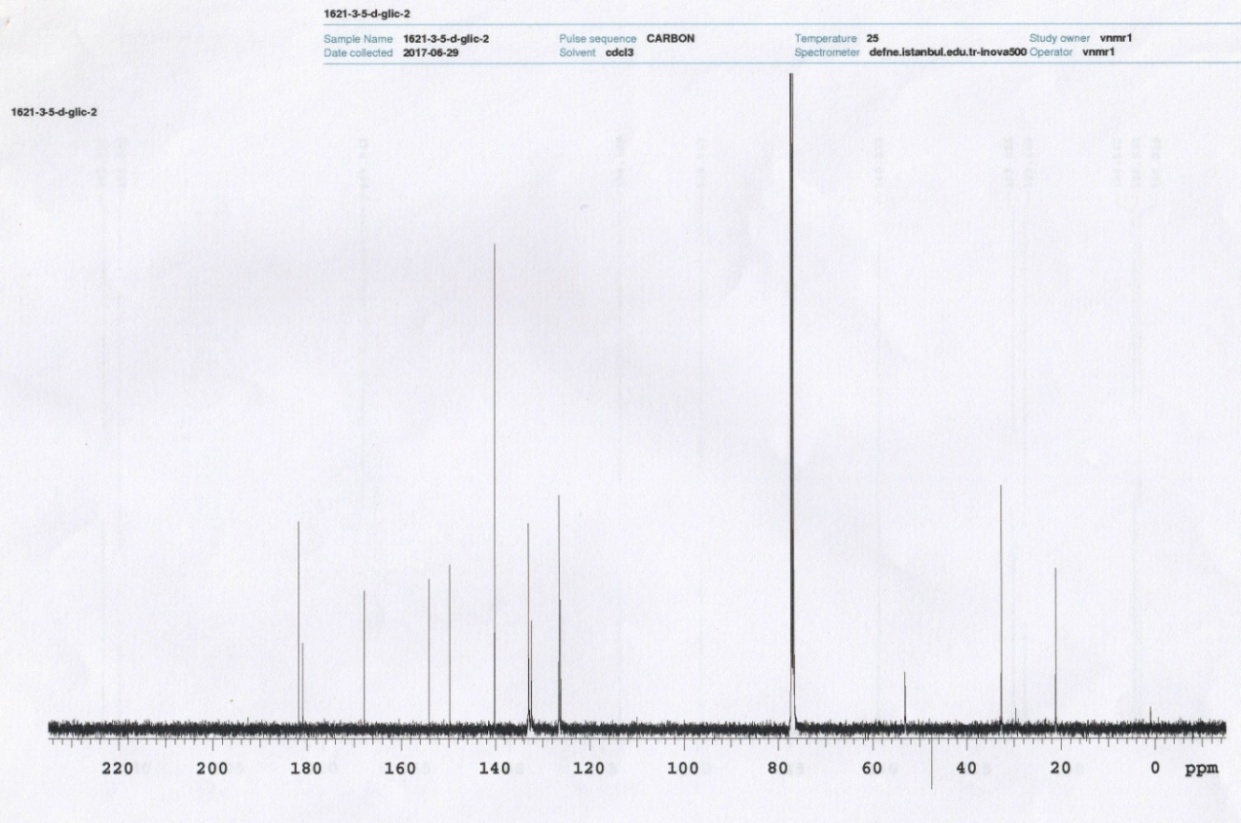


**Figure S 24:** 1H NMR spectrum of **18**

AV:

3

NL:

3.29E7

T:

- c ESI Full ms [ 50.00-1000.00]

100

200

300

400

500

600

700

800

900

1000

m/z

0

5

10

15

20

25

30

35

40

45

50

55

60

65

70

75

80

85

90

95

100

Relative Abundance

426.3

428.3

429.3

372.1

562.1

495.9

879.1

821.9

131.1

248.9

626.3

162.2

950.5

708.8

103.0

806.7

348.4

**Figure S 25:** MS(-ESI) spectrum of compound **4**

AV:

11

NL:

8.70E6

T:

- c ESI Full ms2 426.30@30.00 [ 115.00-500.00]

150

200

250

300

350

400

450

500

m/z

0

5

10

15

20

25

30

35

40

45

50

55

60

65

70

75

80

85

90

95

100

Relative Abundance

370.3

426.2

290.4

346.4

425.5

246.6

371.0

427.0

340.3

170.3

278.5

290.9

**Figure S 26:** Fragment spectrum **(MS2)** of **4** (for m/z: 426)

**Figure S 27:** MS(+ESI) spectrum of compound **5**

**Figure S 28:** MS(-ESI) spectrum of **7**

**Figure S 29:** MS(-ESI) spectrum of **10a**

**Figure S 30:** MS(-ESI) spectrum of **10b**

**Figure S 31:** MS(-ESI) spectrum of **10c**

**Figure S 32:** MS(-ESI) spectrum of **11c**

**Figure S 33:** MS(+ESI) spectrum of **14**

**Figure S 34:** MS(+ESI) spectrum of **15**

**Figure S 35:** MS(+ESI) spectrum of **18**
